# Supplementary material
Source: publisher figshare collection journal article supplement (https://gsajournals.figshare.com/ndownloader/files/21191814)
Supplement: Supplementary file 1 [file 21191814]

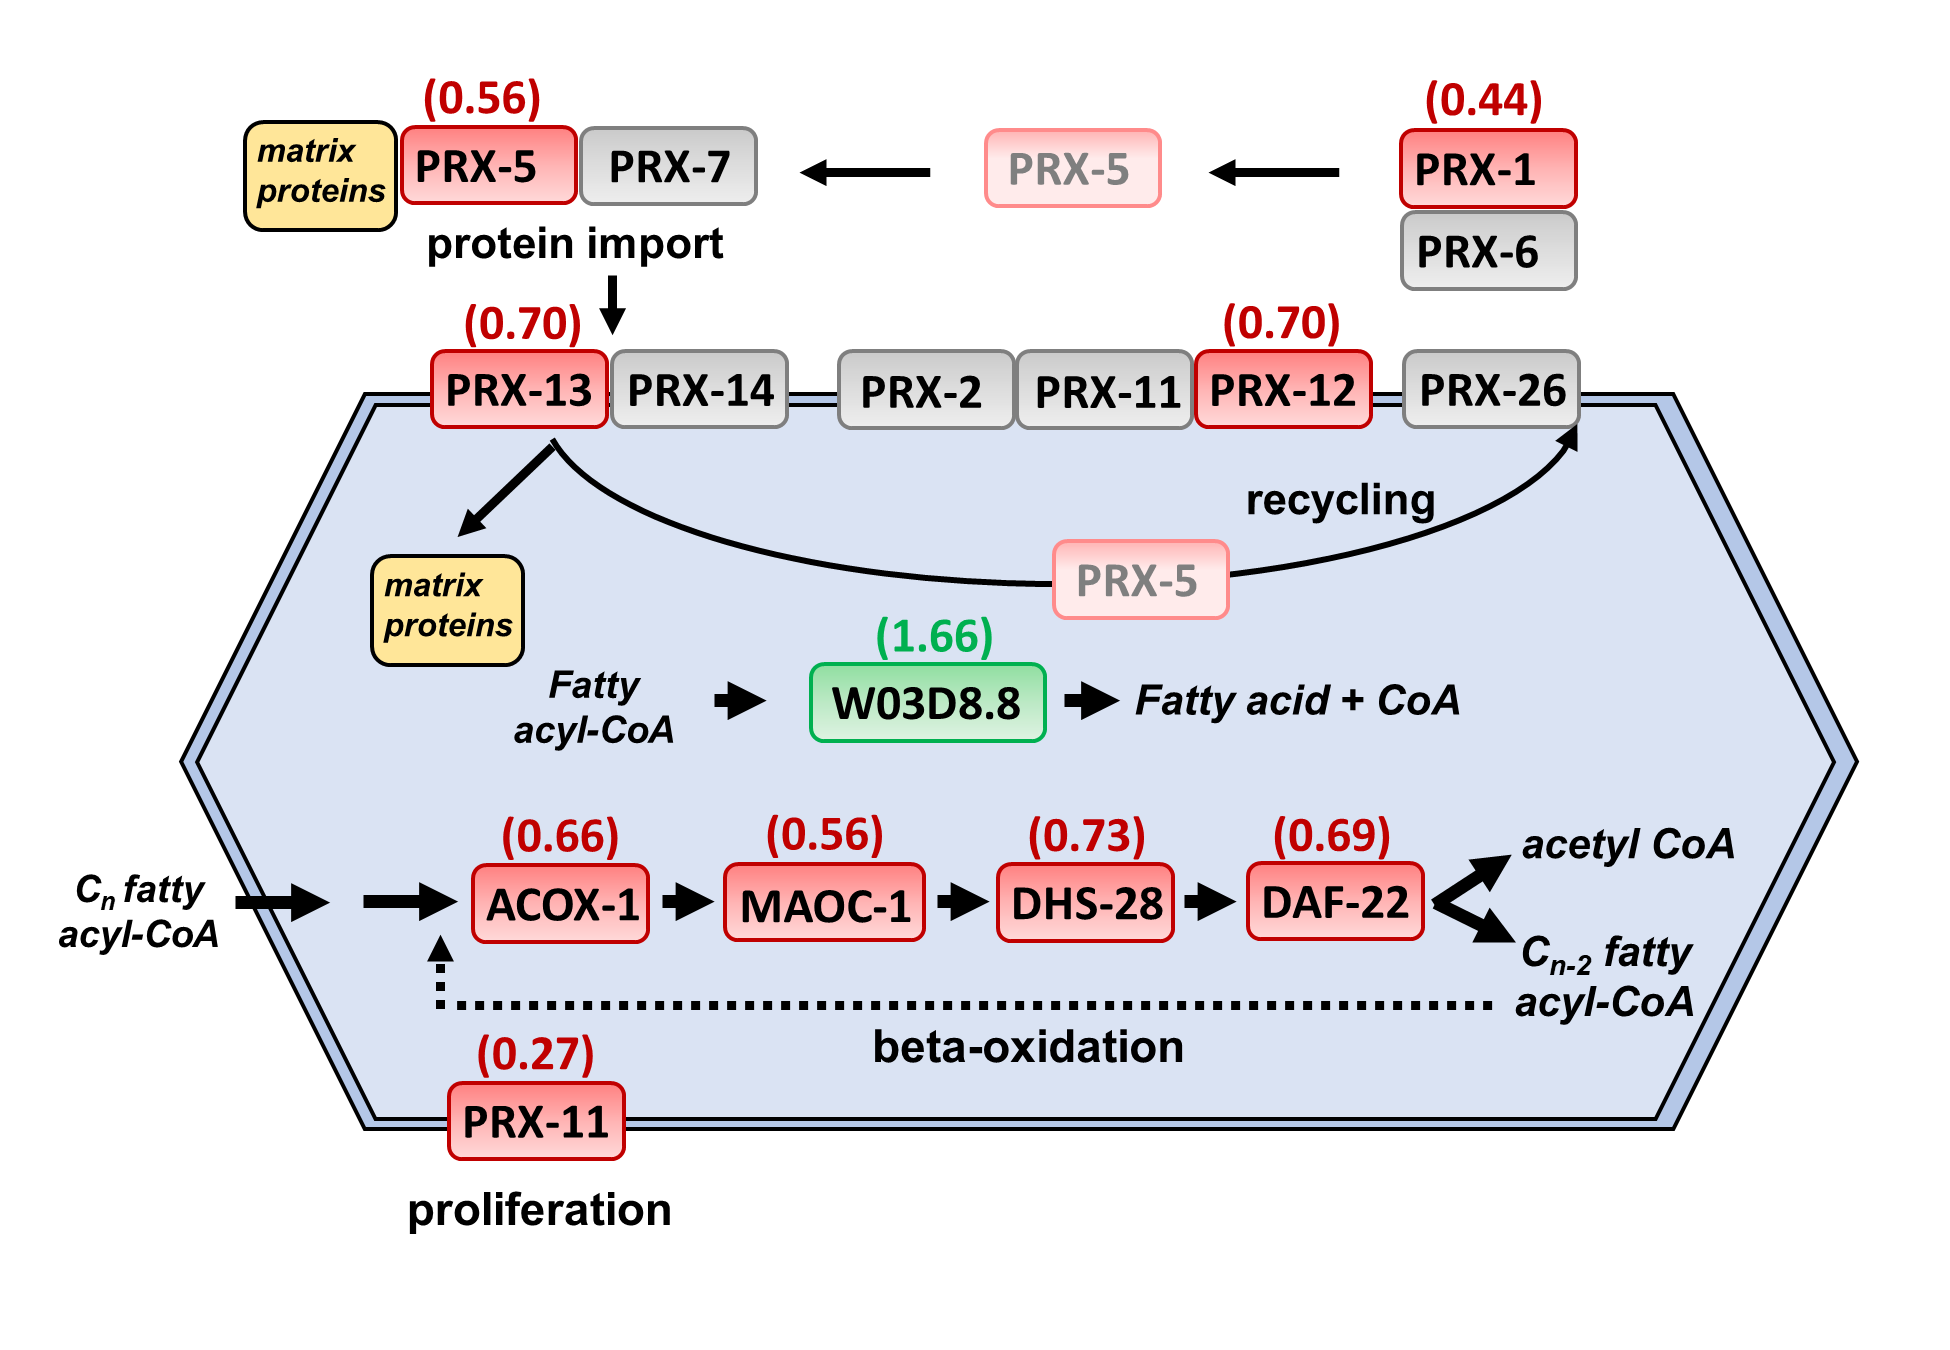


**Figure S3. LIN-29-regulated genes involved in peroxisome function.** Gene products functioning in several aspects of peroxisomal function are shown. Those in grey are not altered by ectopic expression of LIN-29, while green indicates up-regulation and red indicates down-regulation upon *hs::lin-29* induction. The number in parenthesis above the gene indicates the fold change in expression relative to *hs::control*. Figure modified from (Fujiki *et al.* 2014; Zhu *et al.* 2018).
